# Supplementary material for: Exploring the Correlation between Systemic Inflammatory Markers and Carotid Atherosclerosis Indices in Middle-Aged Adults: A Cross-Sectional Study
Source: MDPI journal article supplement (doi:10.3390/jcdd11030073), 2024-02-21
Supplement: s1 [file s1]

Supplementary Table S1. Association of Carotid atherosclerosis indices with systemic inflammatory markers in subjects with mild stenosis

|                          | Hs-CRP |         | ESR  |         | NLR  |         | PLR  |         |
|--------------------------|--------|---------|------|---------|------|---------|------|---------|
|                          | r*     | P-value | r    | P-value | r    | P-value | r    | P-value |
| cIMT Max**               | 0.32   | 0.035   | 0.20 | 0.069   | 0.44 | 0.039   | 0.57 | 0.042   |
| Plaque Number Score (PN) | 0.10   | 0.857   | 0.09 | 0.225   | 0.40 | 0.041   | 0.45 | 0.008   |
| Plaque score (PS)        | 0.52   | 0.020   | 0.28 | 0.010   | 0.58 | 0.029   | 0.55 | 0.005   |

We used correlation analysis using inflammatory markers and scores from ultrasonography. Since plaque scores did not show normal distribution, they are standardized through log transformation. Adjusted for age, body mass index, LDL, TG, HbA1c, smoking, alcohol, and physical activity

\* Pearson correlation coefficient

\*\*cIMT Max refers to the thickness at the thickest intima of the common carotid artery on both sides. cIMT, common carotid artery intima-media thickness; PSV, peak systolic velocity; ICA, internal carotid artery; CCA, common carotid artery; PN, plaque number score; PSS, plaque stenosis score; PS, plaque score

Supplementary Table S2. Association of Carotid atherosclerosis indices with systemic inflammatory markers in subjects with moderate to severe stenosis

|                          | Hs-CRP |         | ESR  |         | NLR  |         | PLR  |         |
|--------------------------|--------|---------|------|---------|------|---------|------|---------|
|                          | r*     | P-value | r    | P-value | r    | P-value | R    | P-value |
| cIMT Max**               | 0.35   | 0.048   | 0.23 | 0.044   | 0.55 | 0.028   | 0.61 | 0.011   |
| Plaque Number Score (PN) | 0.05   | 0.665   | 0.15 | 0.107   | 0.48 | 0.049   | 0.53 | 0.035   |
| Plaque score (PS)        | 0.62   | 0.041   | 0.31 | 0.025   | 0.60 | 0.016   | 0.69 | 0.009   |

We used correlation analysis using inflammatory markers and scores from ultrasonography. Adjusted for age, body mass index, LDL, TG, HbA1c, smoking, alcohol, and physical activity

\* Spearman correlation coefficient

\*\*cIMT Max refers to the thickness at the thickest intima of the common carotid artery on both sides. cIMT, common carotid artery intima-media thickness; PSV, peak systolic velocity; ICA, internal carotid artery; CCA, common carotid artery; PN, plaque number score; PSS, plaque stenosis score; PS, plaque score
